# Supplementary material for: Crystallization of Fe3+ in an alkaline aqueous pseudocapacitor system
Source: Royal Society of Chemistry journal article supplement (doi:10.1039/c4ce00660g), 2014-01-01
Supplement: c4ce00660g1.pdf [file c4ce00660g1.pdf]

## Supporting Information

### Crystallization of Fe<sup>3+</sup> in alkaline aqueous pseudocapacitor system

Xu Chen<sup>a,b</sup>, Kunfeng Chen<sup>b</sup>, Hao Wang<sup>a,\*</sup>, Shuyan Song<sup>b,\*</sup>, Dongfeng Xue<sup>b,\*</sup>

<sup>a</sup>Hubei Collaborative Innovation Center for Advanced Organic Chemical Materials,  
Faculty of Physics and Electronic Science, Hubei University, Wuhan 430062, China

<sup>b</sup>State Key Laboratory of Rare Earth Resource Utilization, Changchun Institute of  
Applied Chemistry, Chinese Academy of Sciences, Changchun 130022, China

\*Corresponding authors: nanoguy@126.com; songsy@ciac.ac.cn;  
dongfeng@ciac.ac.cn

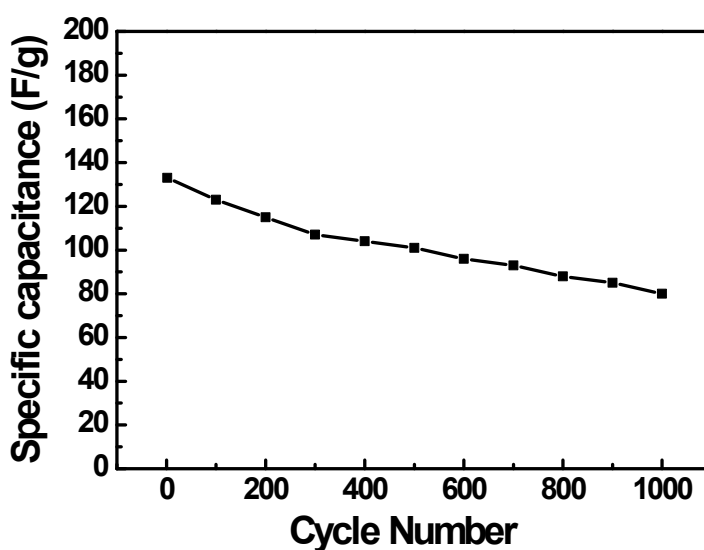

Fig. S1 Cycling stability of FeCl<sub>3</sub> pseudocapacitor at the current density of 30A/g.

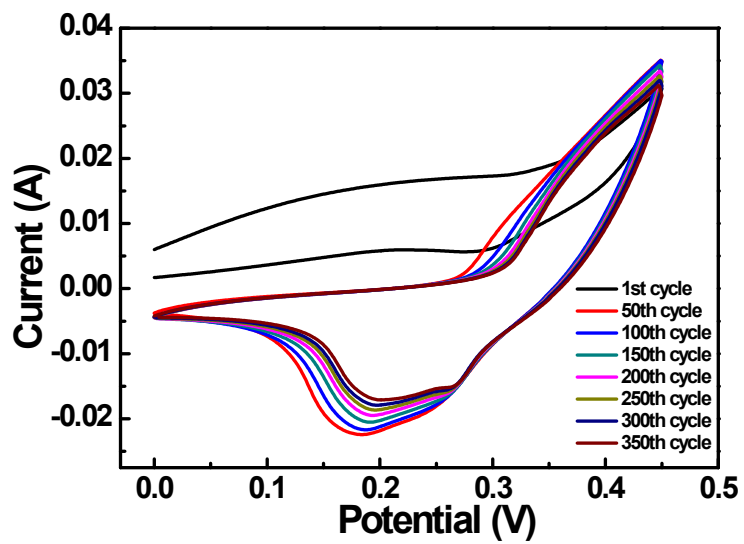

Fig. S2 Cycling stability of FeCl<sub>3</sub> pseudocapacitor at the scan rate of 10 mV/s.
